# Supplementary material for: Activation and deactivation of Ag/CeO2 during soot oxidation: influences of interfacial ceria reduction
Source: Royal Society of Chemistry journal article supplement (doi:10.1039/c7cy00450h), 2017-01-01
Supplement: c7cy00450h1.pdf [file c7cy00450h1.pdf]

## Supporting Information

### Activation and deactivation of Ag/CeO<sub>2</sub> during soot oxidation: Influences of interfacial ceria reduction

Houlin Wang,<sup>a</sup> Shuang Liu,<sup>\*a</sup> Zhen Zhao,<sup>†a</sup> Xin Zou,<sup>†a</sup> Minghan Liu,<sup>b</sup> Wei Liu,<sup>\*a</sup> Xiaodong Wu<sup>b</sup> and Duan Weng<sup>b</sup>

<sup>a</sup> *Institute of Materials Science and Engineering, Ocean University of China, Qingdao 266100, China. E-mail: [lius@ouc.edu.cn](mailto:lius@ouc.edu.cn) (S. Liu); [weiliu@ouc.edu.cn](mailto:weiliu@ouc.edu.cn) (W. Liu)*

<sup>b</sup> *The Key Laboratory of Advanced Materials of Ministry of Education, School of Materials Science and Engineering, Tsinghua University, Beijing 100084, China*

<sup>†</sup> Z.Zhao and X. Zou contributed equally to this work.

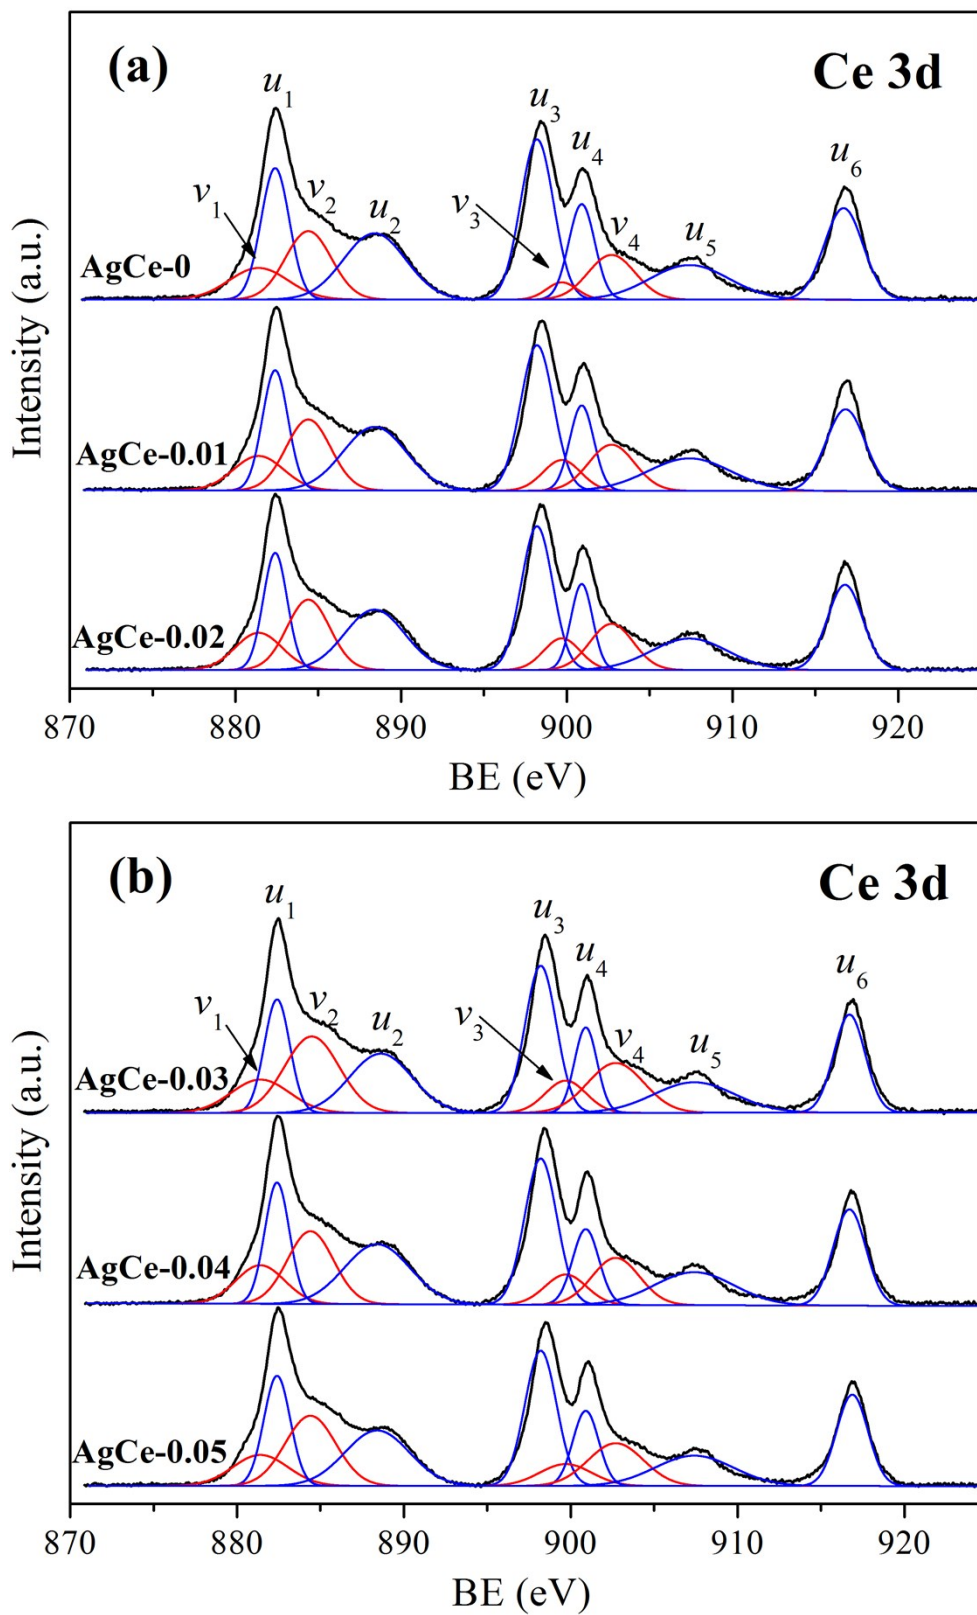

**Fig. S1** Deconvolution of the Ce3d XPS spectra. The red and blue curves are related with  $\text{Ce}^{3+}$  and  $\text{Ce}^{4+}$  species, respectively.

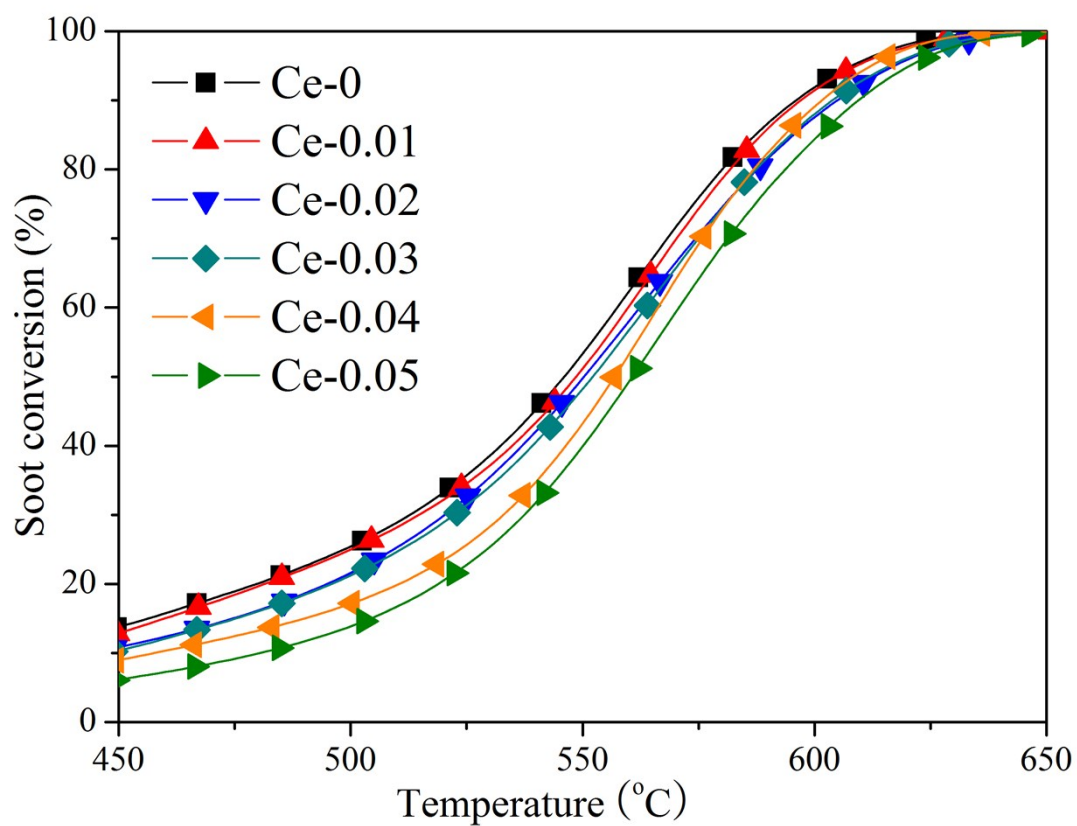

**Fig. S2** Soot oxidation activity of the CeO<sub>2</sub> supports. Ce-0, Ce-0.01, Ce-0.02, Ce-0.03, Ce-0.04 and Ce-0.05 are the supports of AgCe-0, AgCe-0.01, AgCe-0.02, AgCe-0.03, AgCe-0.04 and AgCe-0.05, respectively. Reaction conditions: 1% O<sub>2</sub>/N<sub>2</sub> (500 mL/min), catalyst/soot = 10/1, loose contact, heating rate = 5 °C/min.

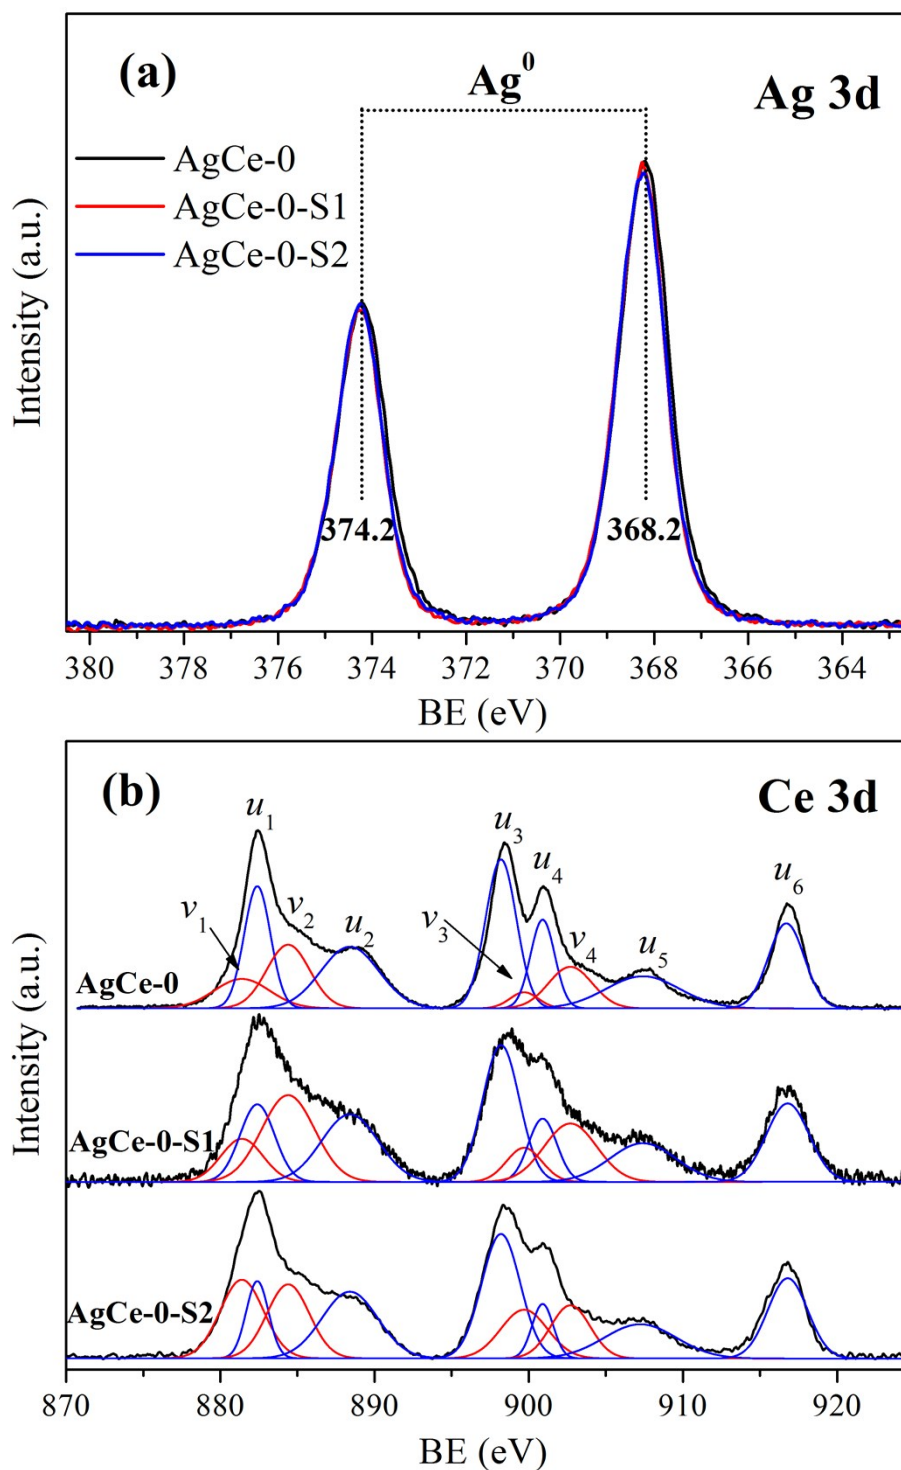

**Fig. S3** XPS in the (a) Ag 3d and (b) Ce 4f core level regions of some Ag/CeO<sub>2</sub> catalysts. AgCe-0-S1 refers to AgCe-0 after reaction with soot isothermally at 300 °C for 30 min. AgCe-0-S2 refers to AgCe-0 after soot-TPO up to 600 °C (heating rate=5 °C/min). According to this deconvolution, the Ce<sup>3+</sup>/Ce<sup>4+</sup> of AgCe-0, AgCe-0-S1 and AgCe-0-S2 are 0.37, 0.55 and 0.64, respectively.

### Some explanation for Fig. S3:

As indicated in this figure, for the spent catalysts, although the silver species always maintained their metallic form, these catalysts may still suffer from excessive  $V_{O-s}$  ( $Ce^{3+}/Ce^{4+} \geq 0.55$ ), thus fall into the continuous deactivation region (**Fig. 9b**) and exhibit only deactivation behavior during a new catalytic cycle. In this sense, the used Ag/CeO<sub>2</sub> catalysts can never be as active for soot oxidation as the fresh ones—they will show progressively lower activity in further soot oxidation reactions.

However, it should be noted that, the reaction atmosphere in this work (CGPF simulation, 1% O<sub>2</sub>/N<sub>2</sub>) is quite different from those of many other studies about soot oxidation catalysts (CDPF/CSF simulation, generally with  $\geq 5$  vol.% O<sub>2</sub>/N<sub>2</sub>, many of which include NO<sub>x</sub>). With larger content of gaseous O<sub>2</sub> (5 vol.% or more), the presence of NO<sub>x</sub> and higher temperatures (e.g.  $>650$  °C), ceria-based catalysts can be re-oxidized much more easily than they did in this work [see A. Setiabudi, et al. *Appl. Catal., B* **51** (2004) 9–19; Y. Gao, et al. *Appl. Catal., B* **203** (2017) 116–126]. Therefore, although the used catalysts could not be regenerated in the CGPF simulative condition in this study, it is possible for them to be regenerated and exhibit activity similar to the fresh catalysts after several soot-TPO cycles in a CDPF/CSF simulative condition [see Y. Wei, et al. *Catal. Sci. Technol.* **3** (2013) 2958–2970; Y. Wei, et al. *Small* **9** (2013) 3957–3963].

**Table S1.** Quantitative analysis of H<sub>2</sub> consumption in H<sub>2</sub>-TPR.

| Catalyst  | Low-temperature<br>H <sub>2</sub> consumption (cm <sup>3</sup> /g <sub>cat.</sub> ) | Mono-layers of<br>CeO <sub>2</sub> reduced by H <sub>2</sub> |
|-----------|-------------------------------------------------------------------------------------|--------------------------------------------------------------|
| AgCe-0    | 3.94                                                                                | 1.03                                                         |
| AgCe-0.01 | 4.14                                                                                | 1.08                                                         |
| AgCe-0.02 | 4.80                                                                                | 1.11                                                         |
| AgCe-0.03 | 5.26                                                                                | 1.25                                                         |
| AgCe-0.04 | 5.51                                                                                | 1.40                                                         |
| AgCe-0.05 | 6.31                                                                                | 1.46                                                         |
